# Supplementary material for: Magnetic water-soluble cyano-bridged metal coordination nano-polymers
Source: Royal Society of Chemistry journal article supplement (doi:10.1039/b602460b), 2006-01-01
Supplement: b602460b.pdf [file b602460b.pdf]

## Supplementary data

### Magnetic Water-Soluble Cyano-Bridged Metal Coordination Nano-polymers.

**Yannick Guari,<sup>\*a</sup> Joulia Larionova,<sup>\*a</sup> Karine Molvinger,<sup>b</sup> Benjamin Folch,<sup>a</sup> and  
Christian Guérin<sup>a</sup>**

<sup>a</sup>Laboratoire de Chimie Moléculaire et Organisation du Solide (LCMOS), UMR 5637,  
Université Montpellier II, Place E. Bataillon, 34095 Montpellier cedex 5, France. Fax:  
(33) 4 67 14 38 52, e-mail: [joulia@univ-montp2.fr](mailto:joulia@univ-montp2.fr); [guari@univ-montp2.fr](mailto:guari@univ-montp2.fr).

<sup>b</sup>Laboratoire de Matériaux Catalytiques et Catalyse en Chimie Organique, UMR 5618-  
CNRS ENSCM, 8 rue de l'Ecole Normale, 34296 Montpellier cedex 5, France.

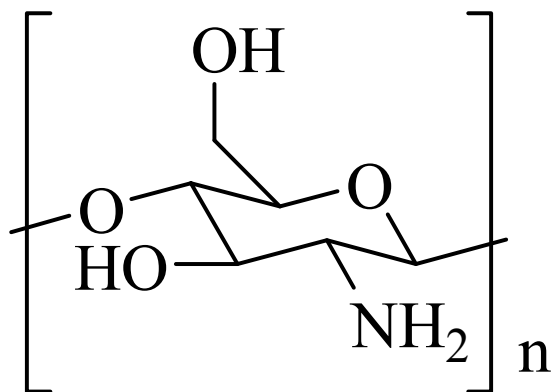

**Figure 1S.** Chitosan formulae.

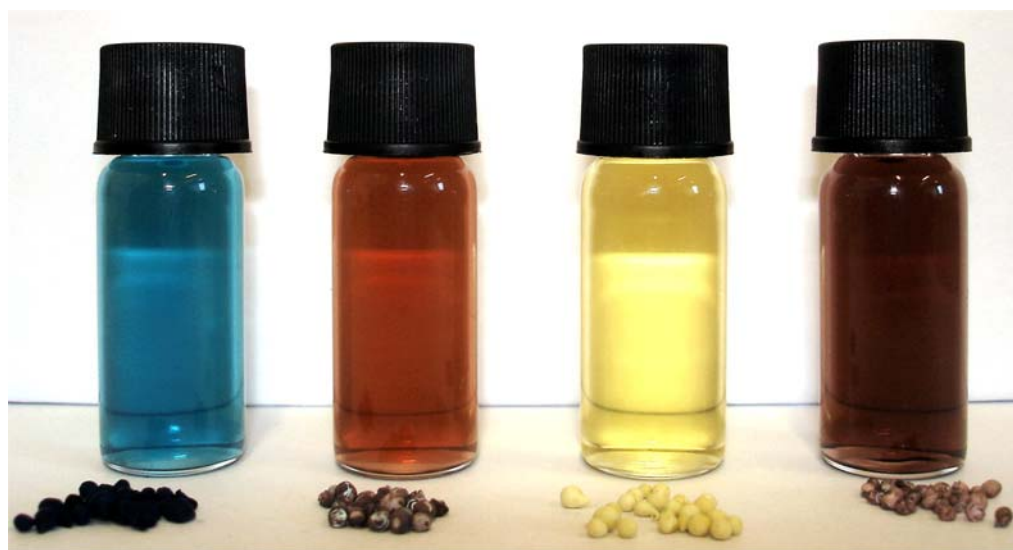

$\text{Fe}^{2+}/[\text{Fe}(\text{CN})_6]^{3-}/$   
chitosan

$\text{Cu}^{2+}/[\text{Fe}(\text{CN})_6]^{3-}/$   
chitosan

$\text{Ni}^{2+}/[\text{Fe}(\text{CN})_6]^{3-}/$   
chitosan

$\text{Co}^{2+}/[\text{Fe}(\text{CN})_6]^{3-}/$   
chitosan

**Figure 2S.** Photograph of the nanocomposite beads **1a-4a** along with the respective aqueous colloids **1b-4b**.

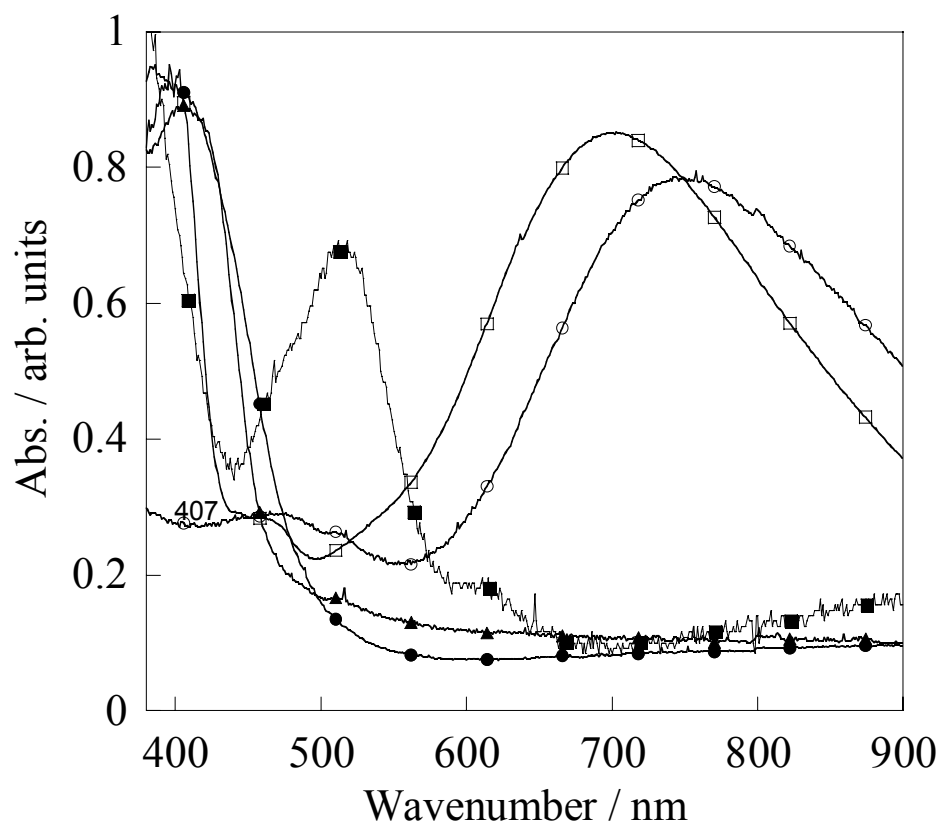

**Figure 3S.** UV-Visible spectra of the colloids **1b-4b**. (●) for **1b**, (○) for **2b**, (◆) for **3b** and (□) for **4b**.

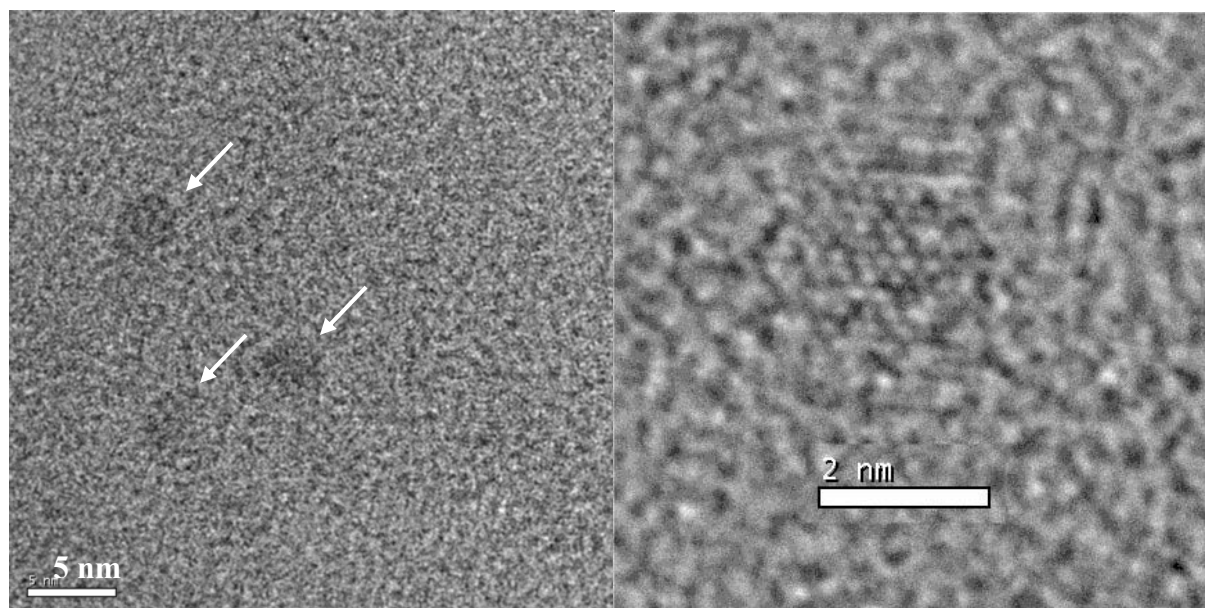

**Figure 4S.** HRTEM images of sample **1b**.

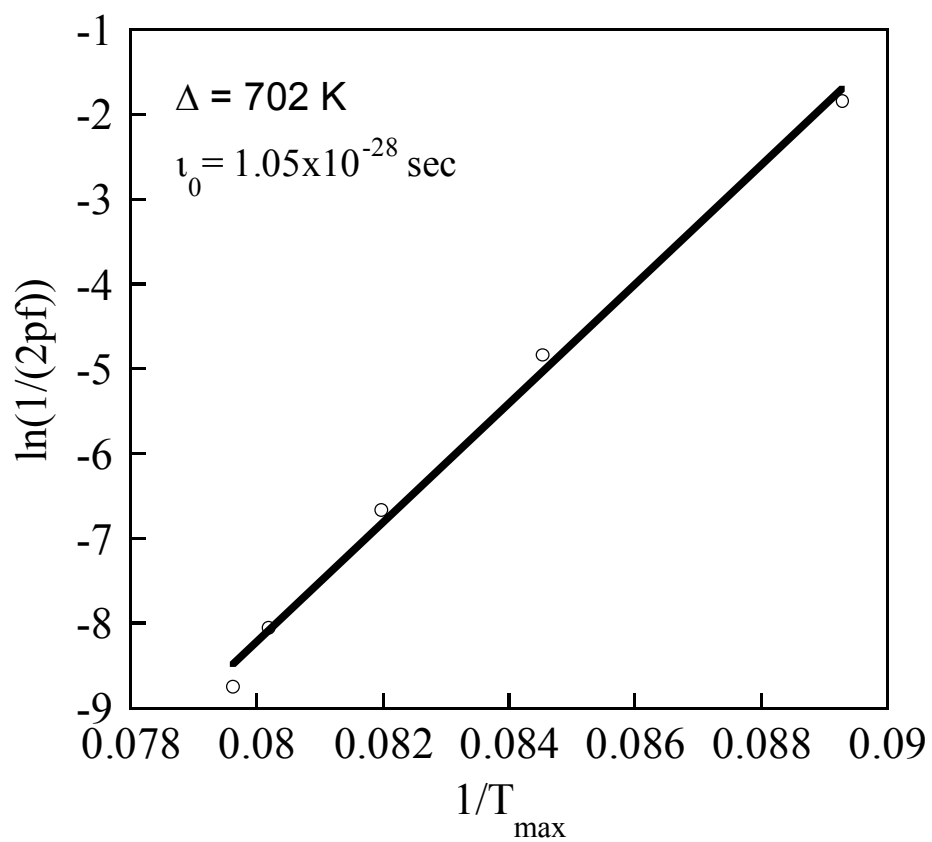

**Figure 5S.** Thermal variation of the relaxation time fitting with the Arrhenius law.

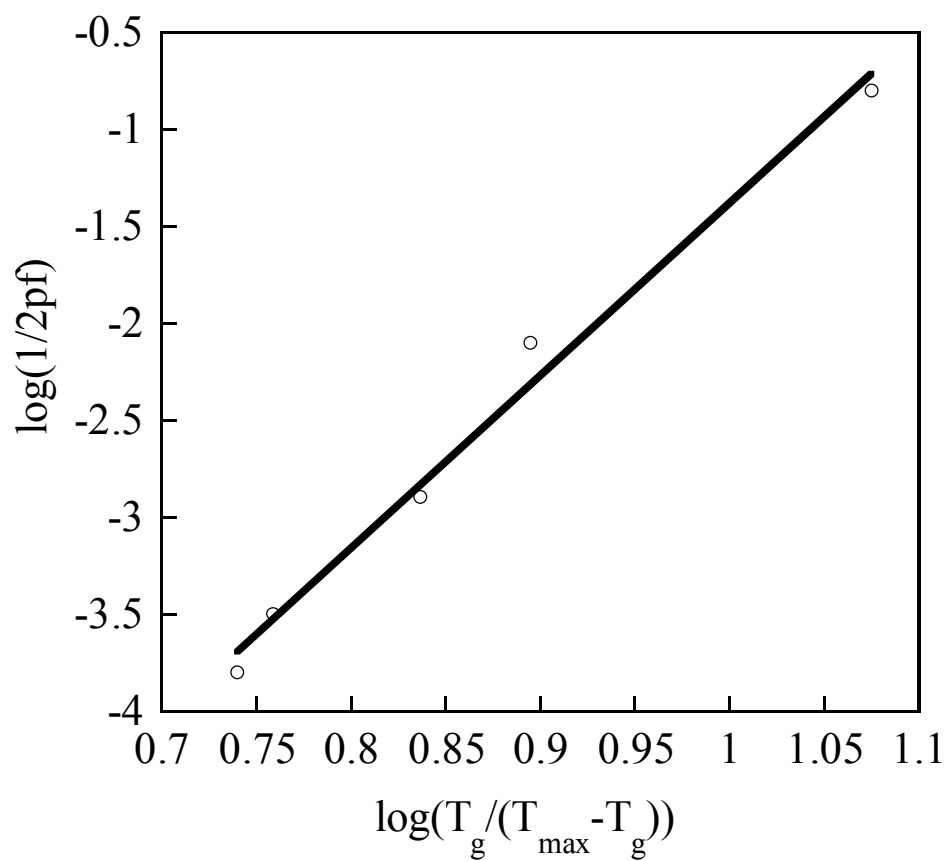

**Figure 6S.** Thermal variation of the relaxation time fitting with the Power law,  $\tau = \tau_0 [T_g / (T_{max} - T_g)]^z$  giving  $T_g = 11.7$  K, and the critical exponent  $z = 8.9$  and  $\tau_0 = 5.4 \times 10^{-11}$  s.

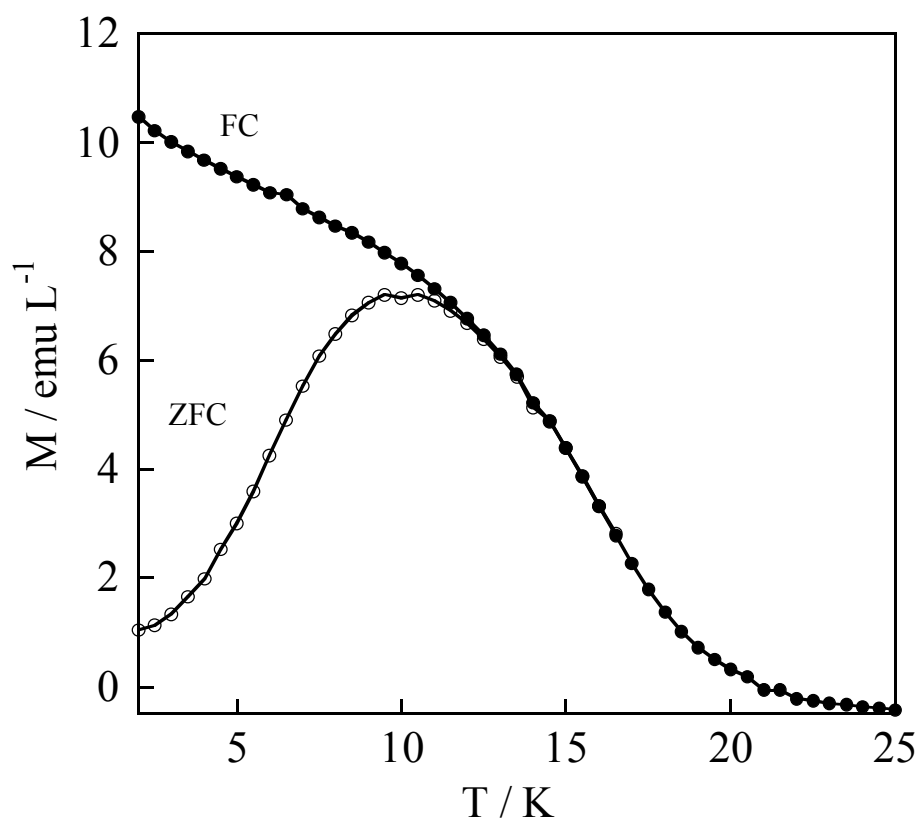

**Figure 7S.** Zero field cooled (ZFC)/ field cooled (FC) magnetization curves for the sample **1a** diluted in eight times. Applied field of 500 Oe.
